# Supplementary material for: Highly enhanced electrochemical performance of ultrafine CuO nanoparticles confined in ordered mesoporous carbons as anode materials for sodium-ion batteries
Source: Royal Society of Chemistry journal article supplement (doi:10.1039/c6ta05238j), 2016-01-01
Supplement: c6ta05238j1.pdf [file c6ta05238j1.pdf]

Electronic Supplementary Information for

Highly enhanced electrochemical performance of ultrafine CuO nanoparticles confined in ordered mesoporous carbons as anode materials for sodium-ion batteries

Purna Chandra Rath, Jagabandhu Patra, Diganta Saikia, Mrinalini Mishra, Jeng-Kuei Chang,\*  
and Hsien-Ming Kao\*

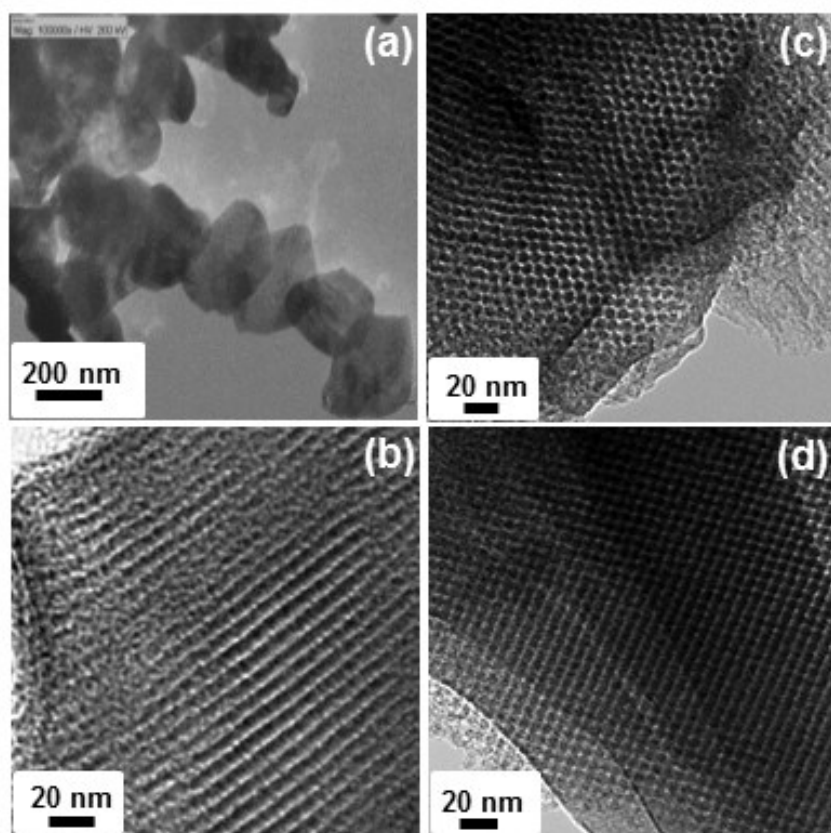

Fig. S1. (a) TEM image of CuO, and HRTEM images of (b) CMK-3 and (c,d) CMK-8.

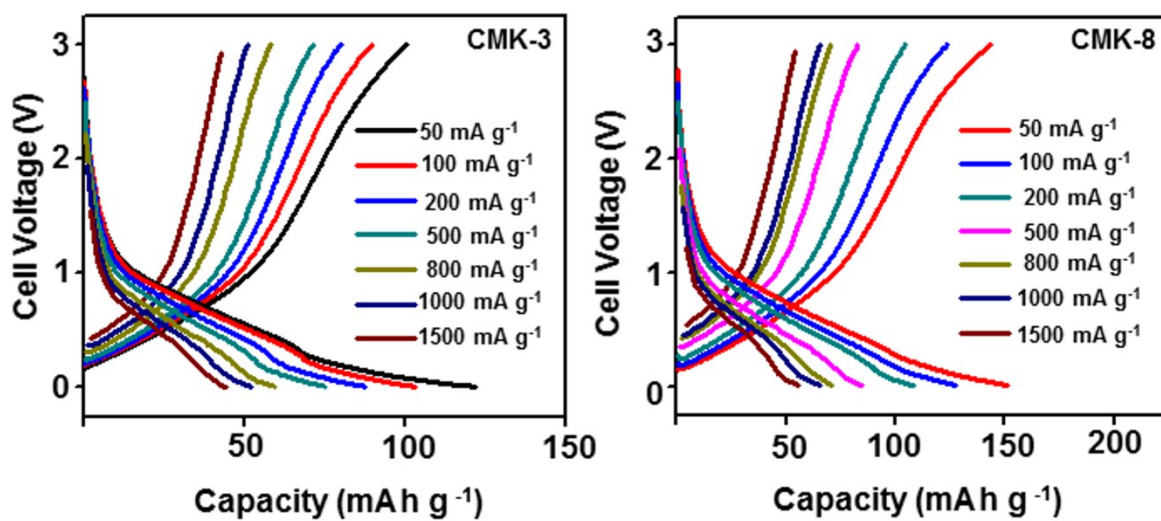

**Fig. S2.** Charge-discharge curves of pristine CMK-3 and CMK-8 at different current densities.

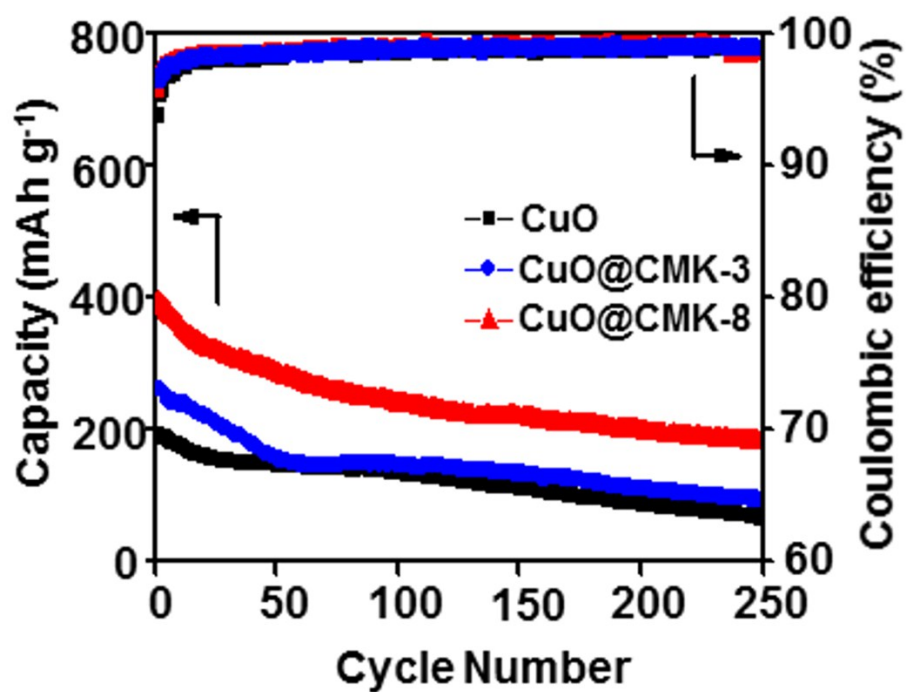

**Fig. S3.** Cyclic performance of CuO, CuO@CMK-3, and CuO@CMK-8 at a current density of 2000 mA g<sup>-1</sup>.

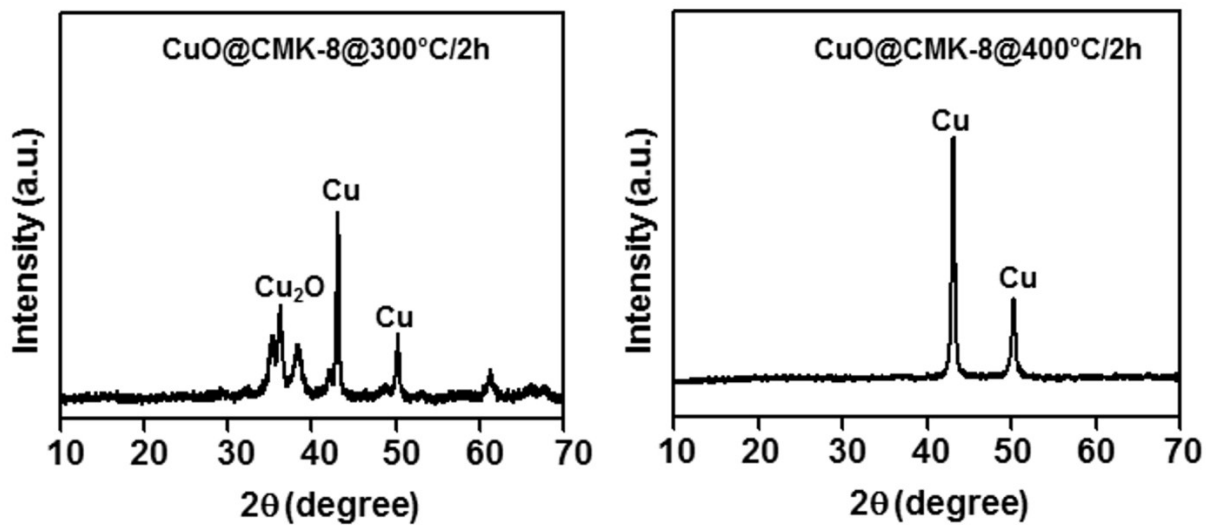

**Fig. S4.** XRD patterns of CuO@CMK-8 thermally treated at 300 °C (left) and 400 °C (right) for 2 h.

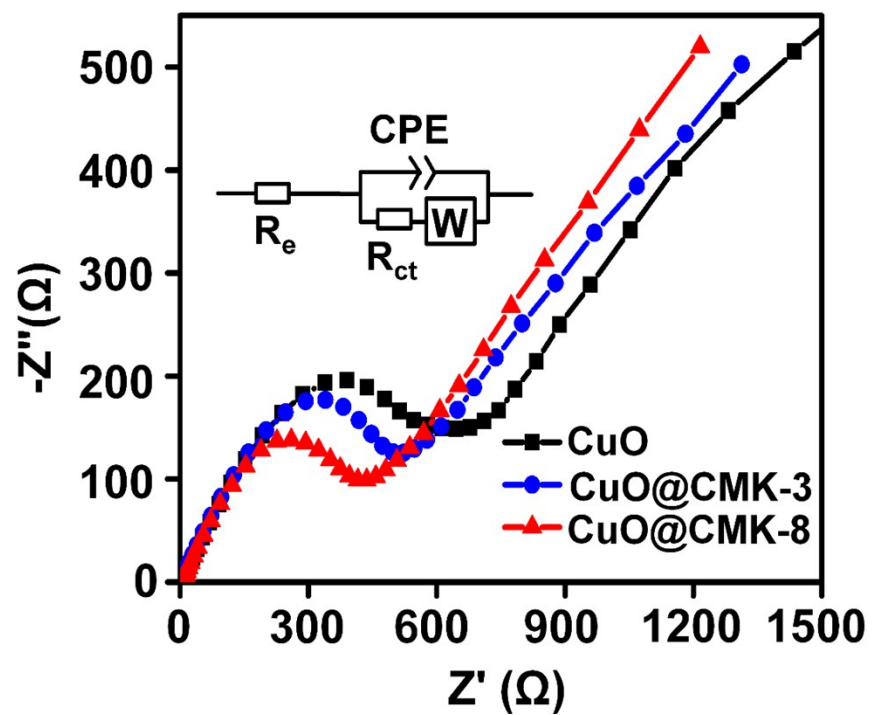

**Fig. S5.** EIS spectra of pristine CuO nanoparticles, CuO@CMK-3 and CuO@CMK-8 electrodes before cycling.

**Table S1.** Charge-discharge capacities of pristine CuO, CuO@CMK-3 and CuO@CMK-8 electrodes at different current densities.

| C-rate<br>(mA g <sup>-1</sup> ) | CuO<br>(mA h g <sup>-1</sup> )     | CuO@CMK-3<br>(mA h g <sup>-1</sup> ) | CuO@CMK-8<br>(mA h g <sup>-1</sup> ) |
|---------------------------------|------------------------------------|--------------------------------------|--------------------------------------|
| 20                              | 425 <sup>a</sup> /448 <sup>b</sup> | 509/553                              | 709/768                              |
| 50                              | 368/377                            | 455/470                              | 667/695                              |
| 100                             | 326/335                            | 418/420                              | 581/593                              |
| 200                             | 292/300                            | 391/401                              | 546/568                              |
| 500                             | 259/262                            | 368/373                              | 515/534                              |
| 800                             | 234/234                            | 323/326                              | 482/502                              |
| 1000                            | 221/221                            | 298/300                              | 448/459                              |
| 1500                            | 197/196                            | 278/284                              | 409/428                              |
| 20                              | 401/411                            | 497/514                              | 699/721                              |

<sup>a</sup> Charge capacity; <sup>b</sup> Discharge capacity

**Table S2.** Charge-discharge capacities of CMK-3 and CMK-8 electrodes at different current densities

| C-rate<br>(mA g <sup>-1</sup> ) | CMK-3<br>(mA h g <sup>-1</sup> )   | CMK-8<br>(mA h g <sup>-1</sup> ) |
|---------------------------------|------------------------------------|----------------------------------|
| 50                              | 101 <sup>a</sup> /122 <sup>b</sup> | 143/151                          |
| 100                             | 90/103                             | 123/126                          |
| 200                             | 80/88                              | 105/108                          |
| 500                             | 71/75                              | 83/83                            |
| 800                             | 60/62                              | 70/71                            |
| 1000                            | 51/52                              | 64/65                            |
| 1500                            | 43/44                              | 55/56                            |

<sup>a</sup> Charge capacity; <sup>b</sup> Discharge capacity
